# Supplementary material for: Depolarization induced III–V triatomic layers with tristable polarization states
Source: Royal Society of Chemistry journal article supplement (doi:10.1039/d3nh00026e), 2023-01-01
Supplement: d3nh00026e1.pdf [file d3nh00026e1.pdf]

Supporting Information

Depolarization Induced III-V Triatomic Layers with Tristable  
Polarization States

Changming Ke,<sup>1,2</sup> Yihao Hu,<sup>3</sup> and Shi Liu<sup>3,2,\*</sup>

<sup>1</sup>*Key Laboratory for Quantum Materials of Zhejiang Province,*

*Department of Physics, School of Science,*

*Westlake University, Hangzhou, Zhejiang 310030, China*

<sup>2</sup>*Institute of Natural Sciences, Westlake Institute for Advanced Study,*

*Hangzhou, Zhejiang 310024, China*

<sup>3</sup>*Key Laboratory for Quantum Materials of Zhejiang Province, Department of Physics,*

*School of Science Westlake University,*

*Hangzhou, Zhejiang 310030, China*

## I. POLARIZATION OF III-V TRIATOMIC LAYERS

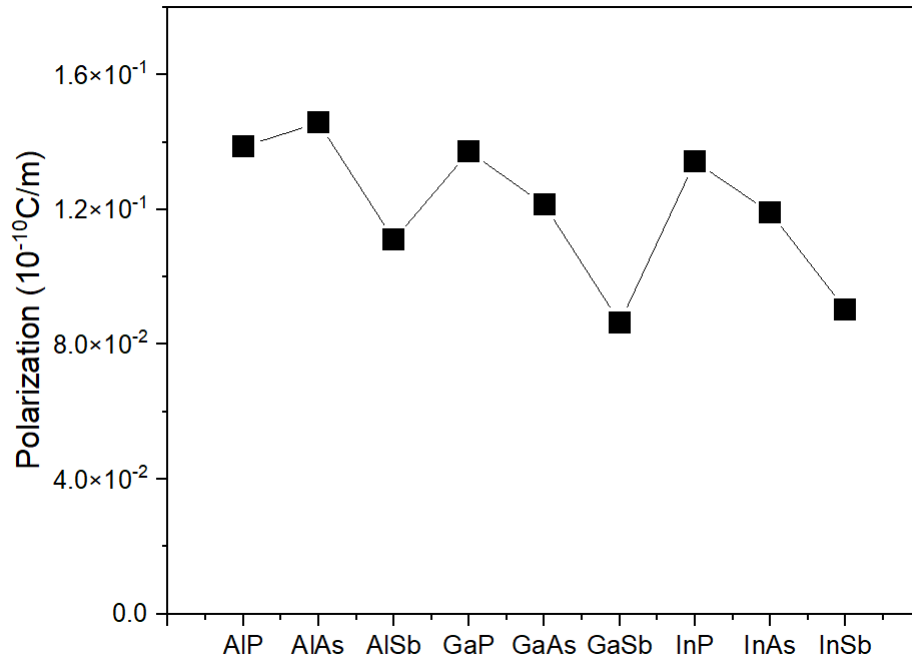

FIG. S1. Out-of-plane polarization of III-V triatomic layers.

\* liushi@westlake.edu.cn

## II. ANTIFERROELECTRIC ORDERING

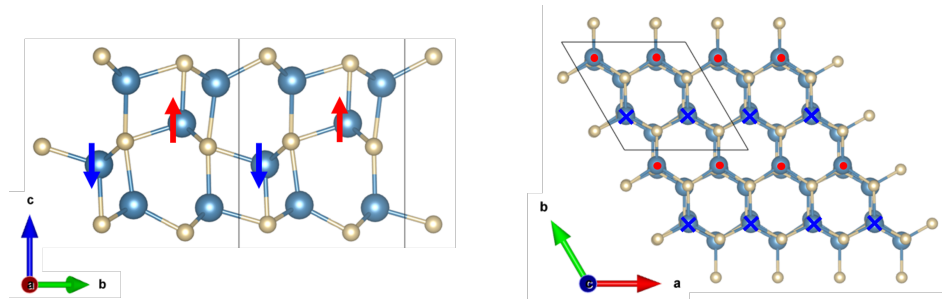

FIG. S2. Side view (left) and top view (right) of antiferroelectric 3L AlSb. Crosses and dots indicate downward and upward polarization, respectively.

### III. SNAPSHOTS OF AIMD

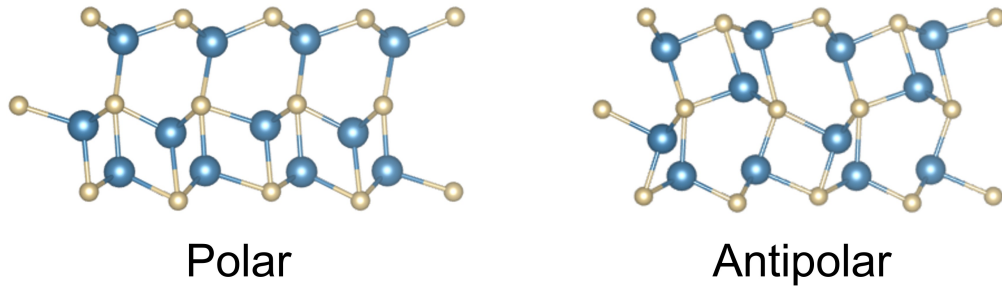

FIG. S3. Snapshots of polar (left) and antipolar (right) configurations at the end of 10 ps AIMD simulations.

#### IV. COMPARISON OF BAND STRUCTURES COMPUTED WITH EACBN0 AND HSE06

The comparison of the band structures computed with the hybrid functional HSE06 [1] and eACBN0 [2–4] for 3L AlSb in the ferroelectric phase is shown in Fig. S4. The eACBN0 predicts the same band dispersion as HSE06 for states over a board energy range from  $-8$  to  $2$  eV but at a fractional computational cost.

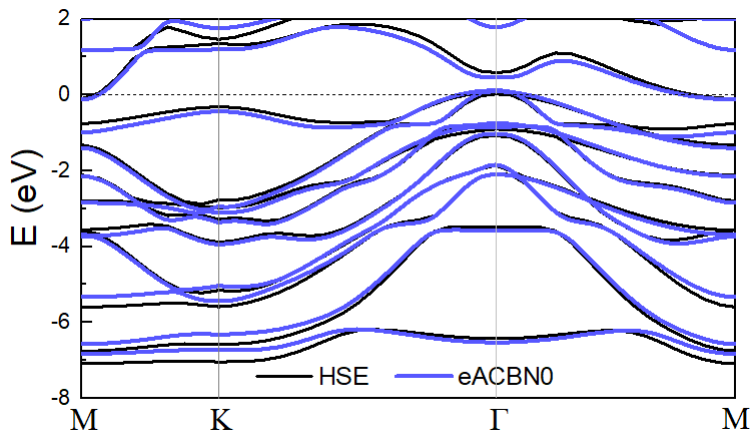

FIG. S4. Comparison of the band structures of ferroelectric 3L AlSb computed with eACBN0 and HSE06.

- 
- [1] A. V. Kruckau, O. A. Vydrov, A. F. Izmaylov, and G. E. Scuseria, Influence of the exchange screening parameter on the performance of screened hybrid functionals, *J. Chem. Phys.* **125**, 224106 (2006).
  - [2] L. A. Agapito, A. Ferretti, A. Calzolari, S. Curtarolo, and M. B. Nardelli, Effective and accurate representation of extended Bloch states on finite Hilbert spaces, *Phys. Rev. B* **88**, 165127 (2013).
  - [3] S.-H. Lee and Y.-W. Son, First-principles approach with a pseudohybrid density functional for extended Hubbard interactions, *Phys. Rev. Research* **2**, 043410 (2020).
  - [4] N. Tancogne-Dejean and A. Rubio, Parameter-free hybridlike functional based on an extended Hubbard model: DFT+ $U$ + $V$ , *Phys. Rev. B* **102**, 155117 (2020).
